# Supplementary material for: Dementia Risk among Coronavirus Disease Survivors: A Nationwide Cohort Study in South Korea
Source: MDPI journal article supplement (doi:10.3390/jpm11101015), 2021-10-09
Supplement: s1 [file s1]

Table S4. The comparison of the clinicopathological characteristics between COVID-19 survivors and the control population after excluding test-negative individuals

| Variable                    | COVID-19 survivor<br>n=7,133 | Control population<br>n=111,825 | P-value |
|-----------------------------|------------------------------|---------------------------------|---------|
| Sex: male                   | 2,813 (39.4)                 | 44,577 (39.9)                   | 0.475   |
| Age                         |                              |                                 | <0.001  |
| 20-29                       | 2,057 (28.8)                 | 30,843 (27.6)                   |         |
| 30-39                       | 829 (11.6)                   | 12,472 (11.2)                   |         |
| 40-49                       | 1,030 (14.4)                 | 15,514 (13.9)                   |         |
| 50-59                       | 1,523 (21.4)                 | 23,329 (20.9)                   |         |
| 60-69                       | 1,103 (15.5)                 | 17,511 (15.7)                   |         |
| 70-79                       | 467 (6.5)                    | 8,197 (7.3)                     |         |
| 80+                         | 124 (1.7)                    | 3,959 (3.5)                     |         |
| Residence in 2020           |                              |                                 | 0.427   |
| Seoul                       | 500 (7.0)                    | 7,554 (6.8)                     |         |
| Gyeonggido                  | 407 (5.7)                    | 6,274 (5.6)                     |         |
| Daegu                       | 4,673 (65.5)                 | 73,128 (65.4)                   |         |
| Gyeongsangbukdo             | 790 (11.1)                   | 13,161 (11.8)                   |         |
| Other area                  | 763 (10.7)                   | 11,708 (10.5)                   |         |
| Annual income level in 2020 |                              |                                 | <0.001  |
| Q1 (lowest)                 | 2,204 (30.9)                 | 28,303 (25.3)                   |         |
| Q2                          | 1,390 (19.35)                | 23,115 (20.7)                   |         |
| Q3                          | 1,467 (20.6)                 | 25,647 (22.9)                   |         |
| Q4                          | 1,960 (27.5)                 | 32,823 (29.4)                   |         |
| Unknown                     | 112 (1.6)                    | 1,937 (1.7)                     |         |
| Charlson comorbidity index  | 2 [1,3]                      | 2 [1,3]                         | 0.553   |

|                                       |              |               |        |
|---------------------------------------|--------------|---------------|--------|
| Myocardial infarction                 | 158 (2.2)    | 2,103 (1.9)   | 0.045  |
| Congestive heart failure              | 324 (4.5)    | 5,472 (4.9)   | 0.182  |
| Peripheral vascular disease           | 1,050 (14.7) | 17,341 (15.5) | 0.075  |
| Cerebrovascular disease               | 599 (8.4)    | 9,766 (8.7)   | 0.330  |
| Chronic pulmonary disease             | 3,565 (50.0) | 53,971 (48.3) | 0.005  |
| Rheumatic disease                     | 657 (9.2)    | 9,486 (8.5)   | 0.033  |
| Peptic ulcer disease                  | 2,848 (39.9) | 47,024 (42.1) | <0.001 |
| Mild liver disease                    | 2,960 (41.5) | 45,207 (40.4) | 0.074  |
| Diabetes without chronic complication | 1,522 (21.3) | 24,061 (21.5) | 0.721  |
| Diabetes with chronic complication    | 429 (6.0)    | 6,944 (6.2)   | 0.507  |
| Hemiplegia or paraplegia              | 67 (0.9)     | 737 (0.7)     | 0.005  |
| Renal disease                         | 131 (1.8)    | 2,408 (2.2)   | 0.073  |
| Any malignancy                        | 510 (7.1)    | 8,673 (7.8)   | 0.063  |
| Moderate or severe liver disease      | 24 (0.3)     | 390 (0.3)     | 0.864  |
| Metastatic solid tumour               | 58 (0.8)     | 919 (0.8)     | 0.937  |
| AIDS/HIV                              | 7 (0.1)      | 127 (0.1)     | 0.973  |
| Intracranial Injury                   | 4 (0.1)      | 107 (0.1)     | 0.288  |
| Thyroid disorder                      | 2,310 (32.4) | 35,176 (31.5) | 0.102  |
| Underlying psychiatric illness        |              |               |        |
| Anxiety disorder                      | 1,461 (20.5) | 23,192 (20.7) | 0.603  |
| Substance disorder                    | 96 (1.3)     | 1,068 (1.0)   | 0.001  |
| Depression                            | 971 (13.6)   | 13,966 (12.5) | 0.007  |
| PTSD                                  | 11 (0.2)     | 147 (0.1)     | 0.609  |
| Hospital admission in 2020            | 797 (11.2)   | 1,515 (1.4)   | <0.001 |
| Supplemental Oxygen therapy           | 758 (10.6)   | 1,467 (1.3)   | <0.001 |
| Mechanical ventilator support         | 72 (1.0)     | 56 (0.1)      | <0.001 |
| ICU admission in 2020                 | 162 (2.3)    | 200 (0.2)     | <0.001 |

|                         |          |           |        |
|-------------------------|----------|-----------|--------|
| Development of dementia | 49 (0.7) | 312 (0.3) | <0.001 |
| Alzheimer's dementia    | 36 (0.5) | 242 (0.2) | <0.001 |
| Vascular dementia       | 5 (0.1)  | 21 (0.0)  | 0.004  |
| Other dementia          | 17 (0.2) | 66 (0.1)  | <0.001 |

---

Presented as median value with IQR for Charlson comorbidity index, and number with percentage for other variables (categorical variables)

COVID-19, coronavirus disease, DM, diabetes mellitus; AIDS, acquired immunodeficiency syndrome; HIV, human immunodeficiency virus; PTSD, post-traumatic stress disorder; IQR, interquartile range
