# Supplementary material for: Dementia Risk among Coronavirus Disease Survivors: A Nationwide Cohort Study in South Korea
Source: MDPI journal article supplement (doi:10.3390/jpm11101015), 2021-10-09
Supplement: s1 [file s1]

Table S3. Other variables in multivariable model 1 from Table 2

| Other variables in model 1  | Multivariable model | <i>P</i> -value |
|-----------------------------|---------------------|-----------------|
|                             | HR (95% CI)         |                 |
| Sex: male                   | 0.95 (0.88, 1.01)   | 0.109           |
| Age, 10-year increase       | 3.00 (2.90, 3.11)   | <0.001          |
| Residence in 2020           |                     |                 |
| Seoul                       | 1                   |                 |
| Gyeonggido                  | 0.65 (0.59, 0.71)   | <0.001          |
| Daegu                       | 0.80 (0.73, 0.87)   | <0.001          |
| Gyeongsangbukdo             | 0.32 (0.29, 0.36)   | <0.001          |
| Other area                  | 0.59 (0.53, 0.67)   | <0.001          |
| Annual income level in 2020 |                     |                 |
| Q1 (lowest)                 | 1                   |                 |
| Q2                          | 1.22 (0.92, 1.64)   | 0.171           |
| Q3                          | 0.92 (0.68, 1.24)   | 0.579           |
| Q4                          | 0.90 (0.67, 1.21)   | 0.486           |
| Unknown                     | 0.86 (0.64, 1.15)   | 0.299           |
| Charlson comorbidity index  | 1.19 (1.06, 1.33)   | 0.003           |
| Myocardial infarction       | 1.08 (0.96, 1.20)   | 0.194           |
| Congestive heart failure    | 1.18 (1.09, 1.27)   | <0.001          |
| Peripheral vascular disease | 1.09 (1.02, 1.17)   | 0.016           |
| Cerebrovascular disease     | 1.29 (1.20, 1.39)   | <0.001          |
| Chronic pulmonary disease   | 0.86 (0.79, 0.93)   | <0.001          |
| Rheumatic disease           | 0.94 (0.86, 1.02)   | 0.153           |
| Peptic ulcer disease        | 0.91 (0.84, 0.97)   | 0.007           |
| Mild liver disease          | 0.97 (0.90, 1.05)   | 0.512           |

|                                       |                   |        |
|---------------------------------------|-------------------|--------|
| Diabetes without chronic complication | 1.13 (1.04, 1.22) | 0.003  |
| Diabetes with chronic complication    | 1.13 (1.04, 1.23) | 0.003  |
| Hemiplegia or paraplegia              | 1.79 (1.57, 2.05) | <0.001 |
| Renal disease                         | 1.19 (1.08, 1.31) | <0.001 |
| Any malignancy                        | 0.88 (0.81, 0.95) | 0.002  |
| Moderate or severe liver disease      | 1.31 (1.04, 1.65) | 0.022  |
| Metastatic solid tumour               | 0.96 (0.84, 1.11) | 0.605  |
| AIDS/HIV                              | 1.99 (1.23, 3.21) | 0.005  |
| Intracranial Injury                   | 1.54 (0.93, 2.56) | 0.095  |
| Thyroid disorder                      | 0.90 (0.83, 0.97) | 0.024  |
| Underlying psychiatric illness        |                   |        |
| Anxiety disorder                      | 1.20 (1.11, 1.29) | <0.001 |
| Substance disorder                    | 1.85 (1.53, 2.24) | <0.001 |
| Depression                            | 1.23 (1.14, 1.32) | <0.001 |
| PTSD                                  | 1.45 (0.60, 3.48) | 0.410  |

---

HR, hazard ratio; CI, confidence interval; AIDS, acquired immunodeficiency syndrome; HIV, human immunodeficiency virus; PTSD, post-traumatic stress disorder
