# Supplementary material for: Dementia Risk among Coronavirus Disease Survivors: A Nationwide Cohort Study in South Korea
Source: MDPI journal article supplement (doi:10.3390/jpm11101015), 2021-10-09
Supplement: s1 [file s1]

Table S2. The clinico-epidemiological characteristics of all the study participants (n=306,577)

| Variable                    | Number (%)     | Mean (SD) |
|-----------------------------|----------------|-----------|
| Sex: male                   | 136,820 (44.6) |           |
| Age                         |                |           |
| 20-29                       | 70,371 (23.0)  |           |
| 30-39                       | 51,207 (16.7)  |           |
| 40-49                       | 47,736 (15.6)  |           |
| 50-59                       | 53,405 (17.4)  |           |
| 60-69                       | 42,805 (14.0)  |           |
| 70-79                       | 25,847 (8.4)   |           |
| ≥80                         | 15,206 (5.0)   |           |
| Residence in 2020           |                |           |
| Seoul                       | 50,406 (16.4)  |           |
| Gyeonggido                  | 53,511 (17.5)  |           |
| Daegu                       | 97,180 (31.7)  |           |
| Gyeongsangbukdo             | 24,909 (8.1)   |           |
| Other area                  | 80,571 (26.3)  |           |
| Annual income level in 2020 |                |           |
| Q1 (lowest)                 | 69,505 (22.7)  |           |
| Q2                          | 61,496 (20.1)  |           |
| Q3                          | 75,267 (24.6)  |           |
| Q4                          | 94,995 (31.0)  |           |
| Unknown                     | 5,314 (1.7)    |           |
| Charlson comorbidity index  |                | 3.0 (3.0) |
| Myocardial infarction       | 9,272 (3.0)    |           |
| Congestive heart failure    | 27,165 (8.9)   |           |
| Peripheral vascular disease | 54,586 (17.8)  |           |

|                                       |                |
|---------------------------------------|----------------|
| Cerebrovascular disease               | 35,384 (11.5)  |
| Chronic pulmonary disease             | 173,762 (56.7) |
| Rheumatic disease                     | 31,811 (10.4)  |
| Peptic ulcer disease                  | 140,179 (45.7) |
| Mild liver disease                    | 137,873 (45.0) |
| Diabetes without chronic complication | 80,716 (26.3)  |
| Diabetes with chronic complication    | 25,597 (8.3)   |
| Hemiplegia or paraplegia              | 3,639 (1.2)    |
| Renal disease                         | 12,486 (4.1)   |
| Any malignancy                        | 42,701 (13.9)  |
| Moderate or severe liver disease      | 2,600 (0.8)    |
| Metastatic solid tumour               | 8,286 (2.7)    |
| AIDS/HIV                              | 558 (0.2)      |
| Intracranial Injury                   | 441 (0.1)      |
| Thyroid disorder                      | 110,665 (36.1) |
| Underlying psychiatric illness        |                |
| Anxiety disorder                      | 73,866 (24.1)  |
| Substance disorder                    | 5,187 (1.7)    |
| Depression                            | 49,987 (16.3)  |
| PTSD                                  | 531 (0.2)      |
| Hospital admission in 2020            | 39,542 (12.9)  |
| Supplemental Oxygen therapy           | 37,794 (12.3)  |
| Mechanical ventilator support         | 5,431 (1.8)    |
| ICU admission in 2020                 | 11,976 (3.9)   |
| Development of dementia               | 3,546 (1.2)    |
| Alzheimer's dementia                  | 2,668 (0.9)    |
| Vascular dementia                     | 326 (0.1)      |

Other dementia

986 (0.3)

---

SD, standard deviation; AIDS, acquired immunodeficiency syndrome; HIV, human immunodeficiency virus; PTSD, post-traumatic stress disorder
